# Supplementary material
Source: Springer Nature journal article supplement (https://www.springermedizin.de/resource/supplementary/12936_2012_2545_MOESM1_ESM.pdf/9543150)
Supplement: MOESM1 [file 9543150]

Cumulative proportional survival

- Bb01
- Bb02
- Bb03
- Bb04
- Bb05
- Bb06
- Bb07
- Ma01
- Ma02
- Ma03
- Ma04
- Ma05
- Ma06
- Ma07
- Ma08
- Ma09
- If01

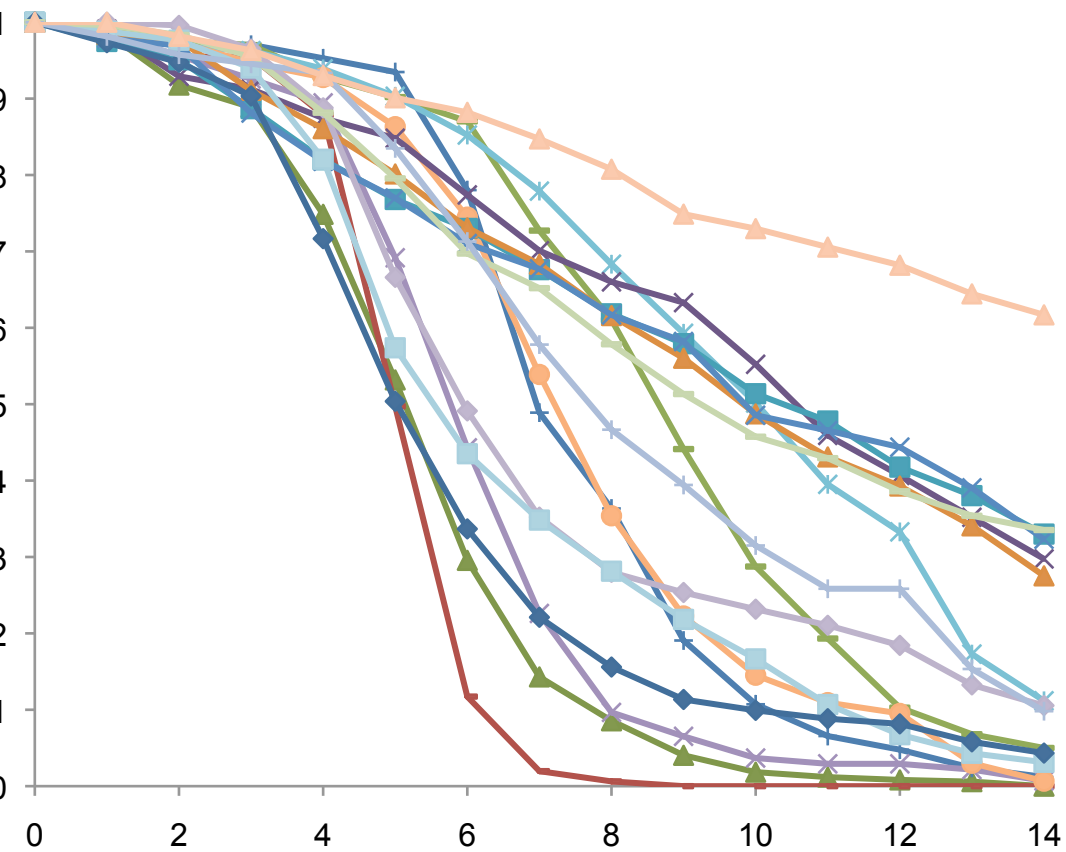

Day after exposure
